# Supplementary material for: Diversity, Genomics and Symbiotic Characteristics of Sinorhizobia That Nodulate Desmanthus spp. in Northwest Argentina
Source: MDPI journal article supplement (doi:10.3390/biology12070958), 2023-07-04
Supplement: s1 [file s1]

**Table S1A. Geolocation of the sites sampled in the provinces of Salta and Jujuy and the host plant species at those sites.**

| Sampled Site | ID <sup>a</sup> | Province | Department             | GPS coordinates                   | Plant-host species    |
|--------------|-----------------|----------|------------------------|-----------------------------------|-----------------------|
| 6            | 6995            | Salta    | Rosario de la Frontera | 64° 56' 40,8'W<br>25° 45' 17,7'S  | <i>D. paspalaceus</i> |
| 7            | 7005            | Jujuy    | El carmen              | 65° 04' 50,7'W<br>24° 32' 15,15'S | <i>D. virgatus</i>    |
| 8            | 7059            | Jujuy    | Ledesma                | 64° 43' 21,8'W<br>23° 45' 40,1'S  | <i>D. virgatus</i>    |

**a:** Corresponding collection number in the catalog of Dr. Pensiero, Facultad de Ciencias Agrarias, Universidad Nacional del Litoral, Argentina.

**Tabla S1B. Climatic and edaphic characteristics of the sampled sites.**

| Sampled site <sup>a</sup> | Climatic data        |                       | Edaphic data            |                 |                     |                      |                       |                 |                        |
|---------------------------|----------------------|-----------------------|-------------------------|-----------------|---------------------|----------------------|-----------------------|-----------------|------------------------|
|                           | Annual rainfall (mm) | Mean Temperature (°C) | Soil order <sup>b</sup> | Texture         | Chemical properties |                      |                       |                 |                        |
|                           |                      |                       |                         |                 | OM <sup>c</sup> (%) | TON <sup>d</sup> (%) | AP <sup>e</sup> (ppm) | pH <sup>f</sup> | EC <sup>g</sup> (dS/m) |
| 6                         | 924.9                | 19.2                  | Entisols                | sandy-gravelly  | 1.99                | 0.091                | 7                     | 7.2             | 0.145                  |
| 7                         | 742.9                | 17.8                  | Molisol                 | Loamy-clay-loam | 2.59                | 0.123                | 23                    | 6.8             | 0.089                  |
| 8                         | 761.9                | 18.2                  | Molisol                 | Clay loam       | 2.11                | 0.100                | 17                    | 6.9             | 0.105                  |

**a:** Geolocation of the host plant species are detailed in Table S1.

**b:** Soil Taxonomy Classification System

**c:** MO: Organic Matter

**d:** TON: Total Organic Nitrogen

**e:** AP: Available phosphorus

**f:** pH (soil:water ratio, 1:2)

**g:** EC:Electrical conductivity.

**Table S2. Best hits resulting from the EZBiocloud searches against partial 16S rDNA sequences of isolates 6-70, 6-117, 7-81 and 8-89.**

| <b>Local isolate 16S<br/>rDNA query <sup>1</sup></b> | <b>Best hit in EZBiocloud</b>              | <b>Identity (%)</b> |
|------------------------------------------------------|--------------------------------------------|---------------------|
| <b>6-70 (Salta)</b>                                  | <i>Sinorhizobium mexicanum</i> ITTG R7     | 99.93               |
|                                                      | <i>Sinorhizobium chiapanecum</i> ITTG S70  | 99.71               |
| <b>6-117 (Salta)</b>                                 | <i>Sinorhizobium mexicanum</i> ITTG R7     | 99.61               |
|                                                      | <i>Sinorhizobium chiapanecum</i> ITTG S70  | 99.37               |
| <b>7-81 (Jujuy)</b>                                  | <i>Sinorhizobium psoraleae</i> CCBAU 65732 | 100.00              |
| <b>8-89 (Jujuy)</b>                                  | <i>Sinorhizobium arboris</i> LMG 14919     | 97.64               |

<sup>1</sup> Query sequence for each isolate corresponding to the sequence stretch that covered the positions homologous to nucleotides 78–1,355 (1,278 bp) of the 16S rDNA in *Sinorhizobium medicae* NBRC100384<sup>T</sup> (GenBank AB681159). The parentheses indicate the province of origin for each isolate (*cf.* the information of the site sampled in Table S1).

**Table S3. MALDI-TOF typing of bacteria from root nodules of *D. virgatus* and *D. paspalaceus* which were nodulated in the field (Jujuy and Salta) or in the laboratory with soil samples.**

| Isolate name | Best candidate in data base | Biotyper Score <sup>1</sup> | Group <sup>2</sup> | Identification            |
|--------------|-----------------------------|-----------------------------|--------------------|---------------------------|
| 6-70         | 6-70                        | 2.84                        | $\alpha$           | <i>Sinorhizobium</i> spp. |
| 6-71         | 6-70                        | 1.9                         | $\alpha$           | <i>Sinorhizobium</i> spp. |
| 6-117        | 6-117                       | 2.84                        | $\alpha$           | <i>Sinorhizobium</i> spp. |
| 7-73         | 6-117                       | 2.01                        | $\alpha$           | <i>Sinorhizobium</i> spp. |
| 7-74         | 8-89                        | 2.423                       | $\alpha$           | <i>Sinorhizobium</i> spp. |
| 7-75         | 7-81                        | 2.088                       | $\alpha$           | <i>Sinorhizobium</i> spp. |
| 7-76         | 8-89                        | 2.488                       | $\alpha$           | <i>Sinorhizobium</i> spp. |
| 7-77         | 7-81                        | 2.138                       | $\alpha$           | <i>Sinorhizobium</i> spp. |
| 7-78         | 8-89                        | 2.155                       | $\alpha$           | <i>Sinorhizobium</i> spp. |
| 7-79         | 8-89                        | 2.548                       | $\alpha$           | <i>Sinorhizobium</i> spp. |
| 7-80         | 7-81                        | 2.41                        | $\alpha$           | <i>Sinorhizobium</i> spp. |
| 7-81         | 7-81                        | 2.84                        | $\alpha$           | <i>Sinorhizobium</i> spp. |
| 7-82         | 8-89                        | 2.46                        | $\alpha$           | <i>Sinorhizobium</i> spp. |
| 8-83         | 7-81                        | 2.55                        | $\alpha$           | <i>Sinorhizobium</i> spp. |
| 8-84         | 8-89                        | 2.13                        | $\alpha$           | <i>Sinorhizobium</i> spp. |
| 8-85         | 8-89                        | 2.10                        | $\alpha$           | <i>Sinorhizobium</i> spp. |
| 8-86         | 8-89                        | 1.70                        | $\alpha$           | <i>Sinorhizobium</i> spp. |
| 8-87         | 8-89                        | 2.52                        | $\alpha$           | <i>Sinorhizobium</i> spp. |
| 8-88         | 7-81                        | 2.15                        | $\alpha$           | <i>Sinorhizobium</i> spp. |
| 8-89         | 8-89                        | 2.85                        | $\alpha$           | <i>Sinorhizobium</i> spp. |
| 8-90         | 8-89                        | 2.08                        | $\alpha$           | <i>Sinorhizobium</i> spp. |
| 8-91         | 8-89                        | 2.58                        | $\alpha$           | <i>Sinorhizobium</i> spp. |
| 8-92         | 8-89                        | 2.45                        | $\alpha$           | <i>Sinorhizobium</i> spp. |
| 8-93         | 8-89                        | 2.58                        | $\alpha$           | <i>Sinorhizobium</i> spp. |
| 8-94         | 6-70                        | 1.85                        | $\alpha$           | <i>Sinorhizobium</i> spp. |
| 8-95         | 8-89                        | 2.56                        | $\alpha$           | <i>Sinorhizobium</i> spp. |
| 8-96         | 7-81                        | 1.73                        | $\alpha$           | <i>Sinorhizobium</i> spp. |

1: Bacterial identification was performed with the MALDI Biotyper Software (Bruker) through the use of the score values proposed by the manufacturer, with a score  $\geq 2$  indicating species identification (green), a score between 1.7 and 1.9 genus identification (yellow), and a score  $< 1.7$  no identification [30, 33].

2: Cf. See manuscript text, first section in Results and Fig. 1.

**Table S4. Growth of rhizobia that nodulate *D. virgatus* and *D. paspalaceus* evaluated under different abiotic stressing conditions in agarized-YEM medium.**

| Isolate | Growth at the indicated temperature (°C) <sup>1</sup> |    |    | Growth at indicated pH <sup>1,2</sup> |   |   |   |   |   | Growth at NaCl (%w/v) concentration <sup>1</sup> |    |    |    | Province             |
|---------|-------------------------------------------------------|----|----|---------------------------------------|---|---|---|---|---|--------------------------------------------------|----|----|----|----------------------|
|         | 28                                                    | 35 | 40 | 4                                     | 5 | 6 | 7 | 8 | 9 | 0.5%                                             | 1% | 2% | 3% |                      |
| 6-67    | 5                                                     | 5  | 2  | 2                                     | 2 | 5 | 5 | 5 | 5 | 5                                                | 4  | 0  | 0  | Salta                |
| 6-69    | 5                                                     | 4  | 1  | 2                                     | 4 | 5 | 5 | 5 | 5 | 5                                                | 4  | 0  | 0  | Salta                |
| 6-70    | 5                                                     | 5  | 2  | 2                                     | 4 | 5 | 5 | 5 | 5 | 5                                                | 4  | 0  | 0  | Salta                |
| 6-71    | 5                                                     | 5  | 2  | 2                                     | 4 | 5 | 5 | 5 | 5 | 5                                                | 4  | 0  | 0  | Salta                |
| 6-72    | 5                                                     | 5  | 2  | 2                                     | 4 | 5 | 5 | 5 | 5 | 5                                                | 4  | 0  | 0  | Salta                |
| 6-117   | 5                                                     | 5  | 2  | 2                                     | 4 | 5 | 5 | 5 | 5 | 5                                                | 4  | 0  | 0  | Salta                |
| 7-73    | 5                                                     | 4  | 0  | 3                                     | 3 | 5 | 5 | 3 | 1 | 5                                                | 5  | 4  | 2  | Jujuy                |
| 7-74    | 5                                                     | 4  | 0  | 3                                     | 3 | 5 | 5 | 3 | 1 | 5                                                | 5  | 2  | 1  | Jujuy                |
| 7-75    | 5                                                     | 4  | 0  | 3                                     | 3 | 5 | 5 | 3 | 1 | 5                                                | 5  | 4  | 2  | Jujuy                |
| 7-76    | 5                                                     | 4  | 0  | 2                                     | 3 | 5 | 5 | 3 | 1 | 5                                                | 5  | 2  | 1  | Jujuy                |
| 7-77    | 5                                                     | 4  | 0  | 3                                     | 3 | 5 | 5 | 3 | 1 | 5                                                | 5  | 2  | 1  | Jujuy                |
| 7-78    | 5                                                     | 4  | 0  | 2                                     | 3 | 5 | 5 | 3 | 1 | 5                                                | 5  | 2  | 1  | Jujuy                |
| 7-79    | 5                                                     | 4  | 0  | 2                                     | 3 | 5 | 5 | 3 | 1 | 5                                                | 5  | 2  | 1  | Jujuy                |
| 7-80    | 5                                                     | 5  | 0  | 5                                     | 5 | 5 | 5 | 5 | 4 | 5                                                | 4  | 3  | 2  | Jujuy                |
| 7-81    | 5                                                     | 4  | 0  | 3                                     | 4 | 5 | 5 | 3 | 1 | 5                                                | 4  | 2  | 1  | Jujuy                |
| 7-82    | 5                                                     | 4  | 0  | 2                                     | 3 | 5 | 5 | 3 | 1 | 5                                                | 4  | 2  | 1  | Jujuy                |
| 8-83    | 5                                                     | 5  | 1  | 1                                     | 4 | 5 | 5 | 4 | 3 | 5                                                | 4  | 2  | 0  | Jujuy                |
| 8-84    | 5                                                     | 5  | 1  | 1                                     | 4 | 5 | 5 | 1 | 0 | 5                                                | 4  | 2  | 0  | Jujuy                |
| 8-85    | 5                                                     | 5  | 1  | 1                                     | 4 | 5 | 5 | 4 | 3 | 5                                                | 4  | 1  | 0  | Jujuy                |
| 8-86    | 5                                                     | 5  | 1  | 1                                     | 4 | 5 | 5 | 4 | 3 | 5                                                | 4  | 1  | 0  | Jujuy                |
| 8-87    | 5                                                     | 5  | 2  | 1                                     | 4 | 5 | 5 | 5 | 4 | 5                                                | 4  | 1  | 0  | Jujuy                |
| 8-88    | 5                                                     | 5  | 2  | 1                                     | 4 | 5 | 5 | 5 | 4 | 5                                                | 4  | 1  | 0  | Jujuy                |
| 8-89    | 5                                                     | 5  | 5  | 1                                     | 4 | 5 | 5 | 5 | 4 | 5                                                | 4  | 1  | 0  | Jujuy                |
| 8-90    | 5                                                     | 5  | 2  | 1                                     | 4 | 5 | 5 | 5 | 4 | 5                                                | 4  | 1  | 0  | Jujuy                |
| 8-91    | 5                                                     | 5  | 5  | 1                                     | 4 | 5 | 5 | 5 | 4 | 5                                                | 4  | 1  | 0  | Jujuy                |
| 8-92    | 5                                                     | 5  | 3  | 1                                     | 4 | 5 | 5 | 5 | 4 | 5                                                | 4  | 1  | 0  | Jujuy                |
| 8-93    | 5                                                     | 5  | 4  | 1                                     | 4 | 5 | 5 | 5 | 4 | 5                                                | 4  | 1  | 0  | Jujuy                |
| 8-94    | 5                                                     | 4  | 2  | 1                                     | 4 | 5 | 5 | 5 | 4 | 5                                                | 3  | 2  | 0  | Jujuy                |
| 8-95    | 5                                                     | 4  | 2  | 1                                     | 4 | 5 | 5 | 5 | 4 | 5                                                | 4  | 1  | 0  | Jujuy                |
| 8-96    | 5                                                     | 5  | 0  | 0                                     | 1 | 5 | 5 | 5 | 4 | 5                                                | 4  | 1  | 0  | Jujuy                |
| CB3126  | 5                                                     | 5  | 4  | 0                                     | 4 | 5 | 5 | 5 | 4 | 4                                                | 2  | 1  | 0  | Commercial inoculant |

1: Scores from 5 to 0 indicate the ability of rhizobia to grow under the condition investigated (5 = full development in 2 days, 0 = absence of growth).

2: YEM medium at pH 4 was softer, as expected, than the medium at pH 7 but stable enough to properly streak isolates on the surface

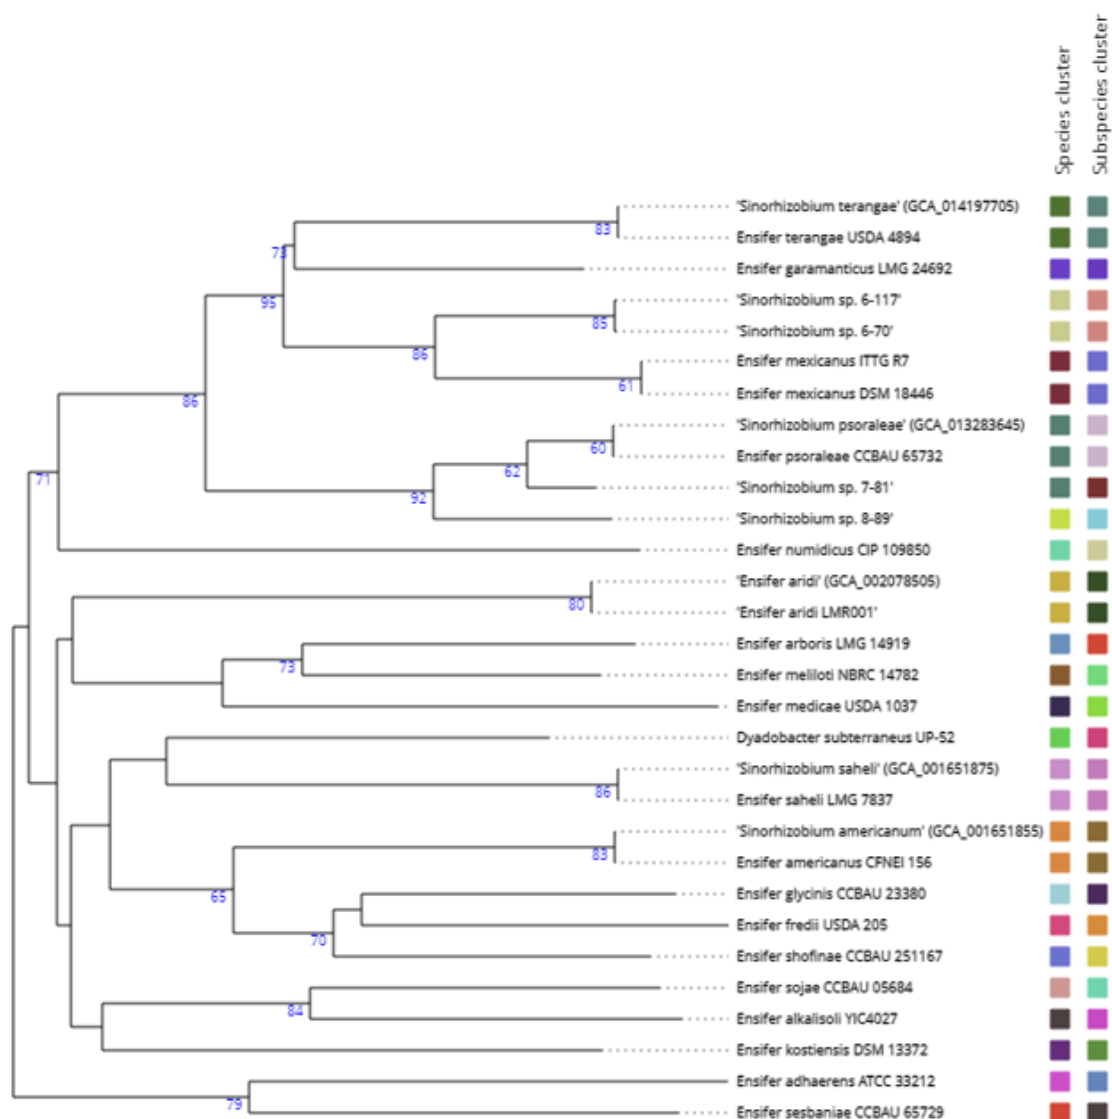

**Figure S1. Phylogenetic tree inferred with FastME from GBDP distances calculated from genome sequences.** The tree was generated with the tools available at <https://tygs.dsmz.de/> (TSGS, Type Strain Genome Server). GBDP refers to genome Blast distances and FastME is an accurate and fast distance-based phylogeny inference program (<http://www.atgc-montpellier.fr/fastme/>). The numbers above branches are GBDP pseudo-bootstrap support values > 60 % from 100 replications. The tree was rooted at the midpoint. Results indicate that the four sequenced isolates most likely belong to three different species: a same species for isolates 6.70 and 6-117, and two different species in case of isolates 7-81 and 7-89) (see color boxes at the first column on the right side of the tree). According to this result and to the ANIb values (Table 2), isolate 7-81 might thus belong to the *S. psoraleae* species.
